# Supplementary material for: Zn2+ and Cu2+ Binding to the Extramembrane Loop of Zrt2, a Zinc Transporter of Candida albicans
Source: MDPI journal article supplement (doi:10.3390/biom12010121), 2022-01-12
Supplement: s1 [file s1]

# **Zn<sup>2+</sup> and Cu<sup>2+</sup> binding to the extramembrane loop of Zrt2, a zinc transporter of *Candida albicans***

**Denise Bellotti,<sup>1,\*</sup> Adriana Miller,<sup>2</sup> Magdalena Rowińska-Żyrek <sup>2</sup> and Maurizio Remelli <sup>3</sup>**

<sup>1</sup> Department of Environmental and Prevention Sciences, University of Ferrara, Via L. Borsari 46, 44121, Ferrara, Italy; bldns@unife.it

<sup>2</sup> Faculty of Chemistry, University of Wrocław, F. Joliot-Curie 14, 50-383, Wrocław, Poland; magdalena.rowinska-zyrek@chem.uni.wroc.pl

<sup>3</sup> Department of Chemical, Pharmaceutical and Agricultural Sciences, University of Ferrara, Via L. Borsari 46, 44121, Ferrara, Italy; rmm@unife.it

*Supplementary Information*

**Table S1.** EPR parameters for Cu<sup>2+</sup> complexes with the studied peptides at I=0.1 M (KCl) and M:L molar ratio = 0.8:1. C<sub>L</sub> = 1.00·10<sup>-3</sup> M (0.79·10<sup>-3</sup> M for L5).

| pH        | L1                           |                          |                                                     |                       |              | L2                           |                          |                                                     |                       |              | L3                           |                          |                                                     |                       |              |
|-----------|------------------------------|--------------------------|-----------------------------------------------------|-----------------------|--------------|------------------------------|--------------------------|-----------------------------------------------------|-----------------------|--------------|------------------------------|--------------------------|-----------------------------------------------------|-----------------------|--------------|
|           | A// [G]<br>(A <sub>z</sub> ) | g//<br>(g <sub>z</sub> ) | g <sub>⊥</sub><br>(g <sub>x</sub> =g <sub>y</sub> ) | MW Frequency<br>[GHz] | Coordination | A// [G]<br>(A <sub>z</sub> ) | g//<br>(g <sub>z</sub> ) | g <sub>⊥</sub><br>(g <sub>x</sub> =g <sub>y</sub> ) | MW Frequency<br>[GHz] | Coordination | A// [G]<br>(A <sub>z</sub> ) | g//<br>(g <sub>z</sub> ) | g <sub>⊥</sub><br>(g <sub>x</sub> =g <sub>y</sub> ) | MW Frequency<br>[GHz] | Coordination |
| <b>3</b>  | 125                          | 2.42                     | 2.08                                                | 9.58                  |              | 122                          | 2.41                     | 2.08                                                | 9.57                  |              | 121                          | 2.41                     | 2.08                                                | 9.58                  |              |
| <b>4</b>  | 123                          | 2.41                     | 2.08                                                | 9.59                  |              | 123                          | 2.41                     | 2.08                                                | 9.58                  |              | 121                          | 2.41                     | 2.08                                                | 9.58                  |              |
| <b>5</b>  | 167                          | 2.30                     | 2.06                                                | 9.59                  | 2N           | 168                          | 2.30                     | 2.06                                                | 9.58                  | 2N           | 163                          | 2.30                     | 2.06                                                | 9.58                  | 2N           |
| <b>6</b>  | 189                          | 2.26                     | 2.05                                                | 9.59                  | 3N           | 186                          | 2.25                     | 2.05                                                | 9.58                  | 3N           | 170                          | 2.27                     | 2.06                                                | 9.58                  | 2N           |
| <b>7</b>  | 201                          | 2.24                     | 2.05                                                | 9.58                  | 3N           | 189                          | 2.25                     | 2.04                                                | 9.58                  | 3N           | 175                          | 2.27                     | 2.06                                                | 9.57                  | 3N           |
| <b>8</b>  | 206                          | 2.20                     | 2.05                                                | 9.59                  | 4N           | 198                          | 2.20                     | 2.04                                                | 9.58                  | 4N           | 183                          | 2.23                     | 2.05                                                | 9.57                  | 3N           |
| <b>9</b>  | 206                          | 2.20                     | 2.05                                                | 9.58                  | 4N           | 199                          | 2.20                     | 2.03                                                | 9.58                  | 4N           | 200                          | 2.18                     | 2.05                                                | 9.58                  | 4N           |
| <b>10</b> | 206                          | 2.20                     | 2.05                                                | 9.58                  | 4N           | 199                          | 2.20                     | 2.03                                                | 9.58                  | 4N           | 200                          | 2.18                     | 2.05                                                | 9.58                  | 4N           |
| <b>11</b> | 206                          | 2.20                     | 2.05                                                | 9.58                  | 4N           | 199                          | 2.20                     | 2.03                                                | 9.58                  | 4N           | 200                          | 2.18                     | 2.04                                                | 9.58                  | 4N           |

| pH        | L4                           |                          |                                                     |                       |              | L5                           |                          |                                                     |                       |              |
|-----------|------------------------------|--------------------------|-----------------------------------------------------|-----------------------|--------------|------------------------------|--------------------------|-----------------------------------------------------|-----------------------|--------------|
|           | A// [G]<br>(A <sub>z</sub> ) | g//<br>(g <sub>z</sub> ) | g <sub>⊥</sub><br>(g <sub>x</sub> =g <sub>y</sub> ) | MW Frequency<br>[GHz] | Coordination | A// [G]<br>(A <sub>z</sub> ) | g//<br>(g <sub>z</sub> ) | g <sub>⊥</sub><br>(g <sub>x</sub> =g <sub>y</sub> ) | MW Frequency<br>[GHz] | Coordination |
| <b>3</b>  | 123                          | 2.42                     | 2.08                                                | 9.58                  |              | 122                          | 2.42                     | 2.08                                                | 9.58                  |              |
| <b>4</b>  | 119                          | 2.42                     | 2.08                                                | 9.57                  |              |                              |                          |                                                     | 9.58                  |              |
| <b>5</b>  | 167                          | 2.30                     | 2.06                                                | 9.57                  | 2N           | 140                          | 2.36                     | 2.07                                                | 9.58                  | 1N           |
| <b>6</b>  | 172                          | 2.28                     | 2.06                                                | 9.58                  | 2N           | 140                          | 2.36                     | 2.07                                                | 9.57                  | 1N           |
| <b>7</b>  | 174                          | 2.27                     | 2.05                                                | 9.58                  | 3N           | 140                          | 2.36                     | 2.07                                                | 9.57                  | 1N           |
| <b>8</b>  | 176                          | 2.25                     | 2.05                                                | 9.57                  | 3N           |                              |                          |                                                     | 9.58                  |              |
| <b>9</b>  | 192                          | 2.19                     | 2.05                                                | 9.58                  | 4N           |                              |                          |                                                     | 9.58                  |              |
| <b>10</b> | 195                          | 2.19                     | 2.05                                                | 9.58                  | 4N           |                              |                          |                                                     | 9.58                  |              |
| <b>11</b> | 195                          | 2.19                     | 2.05                                                | 9.58                  | 4N           | 186                          | 2.24                     | 2.07                                                | 9.58                  | 3N           |

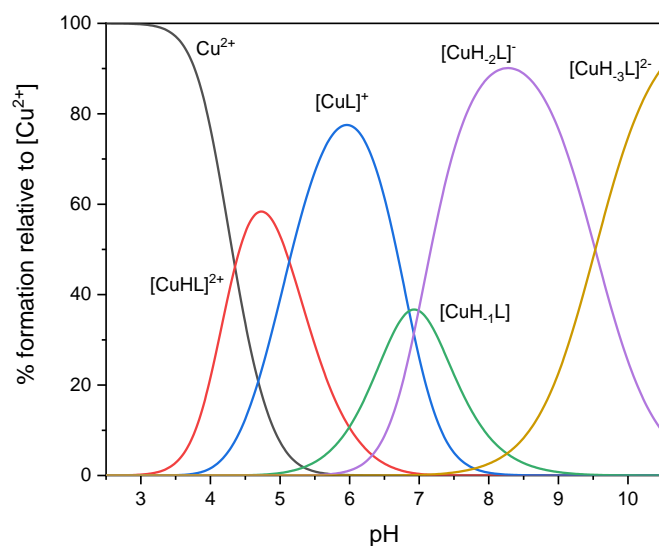

**Figure S1.** Species distribution diagram of  $Cu^{2+}/Ac-GPHTSHFGD-Am$ ; M:L ratio 0.8:1,  $C_M = 0.79 \cdot 10^{-3}$  M.

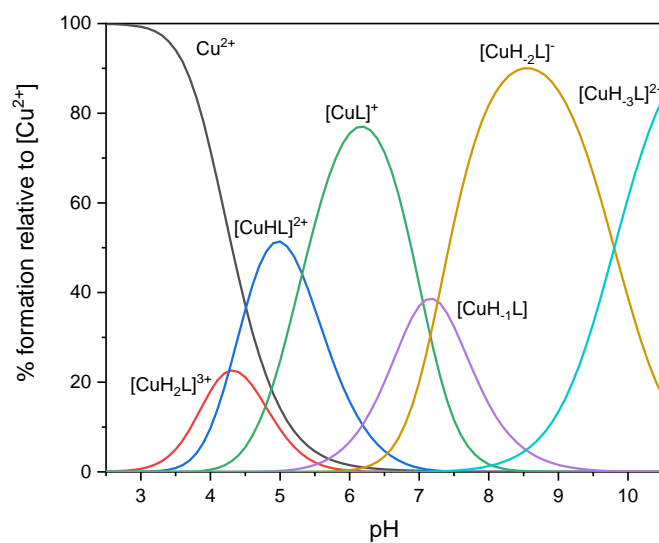

**Figure S2.** Species distribution diagram of  $Cu^{2+}/Ac-GPHTAHFGD-Am$ ; M:L ratio 0.8:1,  $C_M = 0.79 \cdot 10^{-3}$  M.

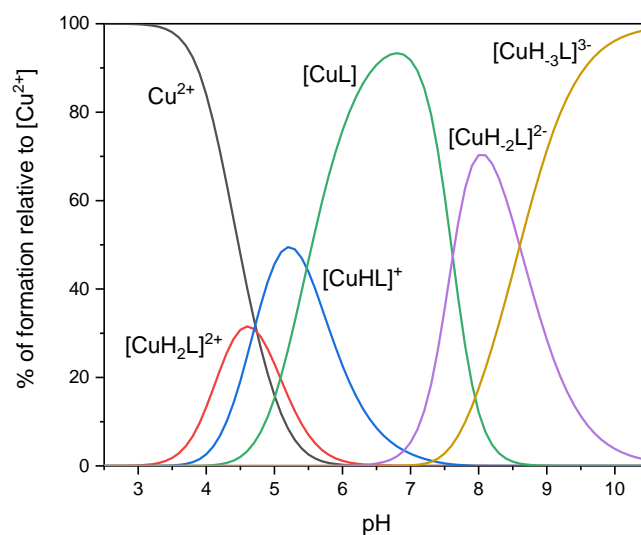

**Figure S3.** Species distribution diagram of  $Cu^{2+}/Ac\text{-PSHFAHAQEHQDP-Am}$ ; M:L ratio 0.8:1,  $C_M = 0.79 \cdot 10^{-3} \text{ M}$ .

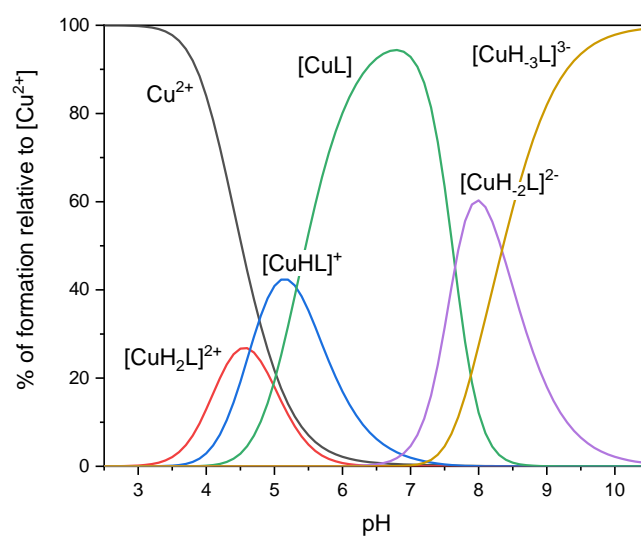

**Figure S4.** Species distribution diagram of  $Cu^{2+}/Ac\text{-PAHFAHAQEHQDP-Am}$ ; M:L ratio 0.8:1,  $C_M = 0.79 \cdot 10^{-3} \text{ M}$ .

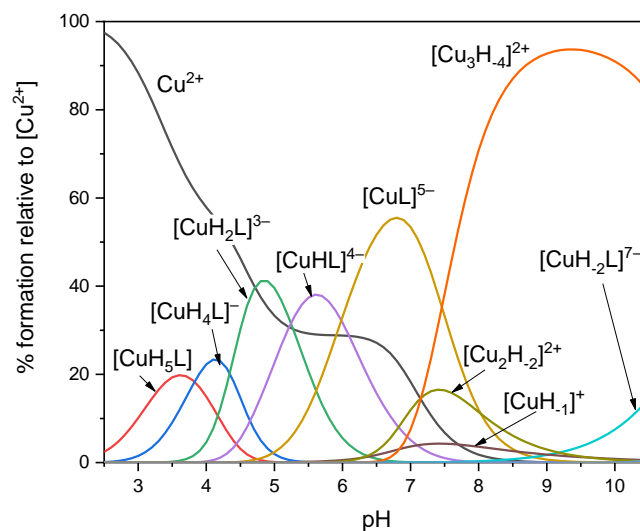

**Figure S5.** Species distribution diagram of  $\text{Cu}^{2+}/\text{Ac-DDEEDLE-Am}$ ; M:L ratio 0.8:1,  $C_M = 0.79 \cdot 10^{-3}$  M.

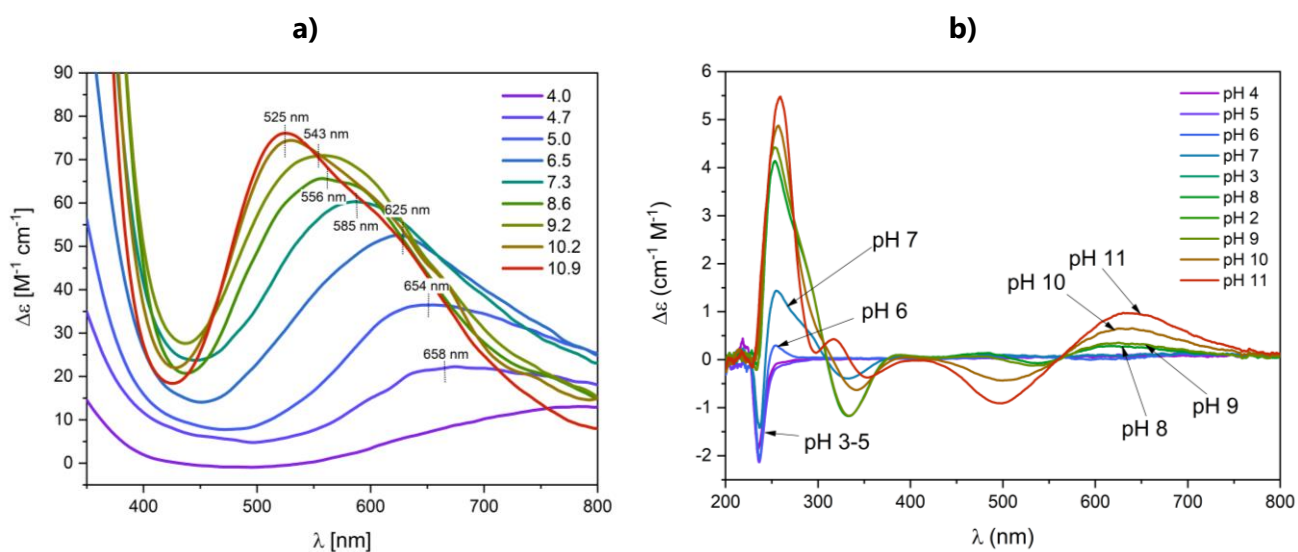

**Figure S6.** (a) Vis absorption spectra, (b) CD spectra of  $\text{Cu}^{2+}/\text{Ac-GPHTHAHFGD-Am}$  system; M:L ratio 0.9:1.  $C_M = 0.63 \cdot 10^{-3}$  M, optical path 1 cm.

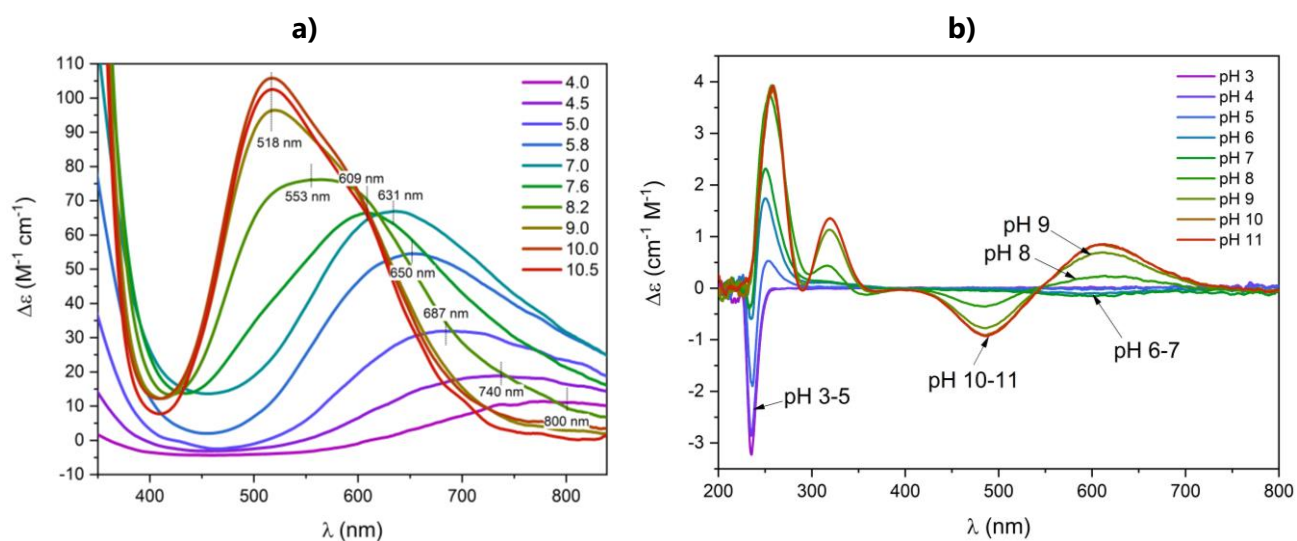

**Figure S7.** (a) Vis absorption spectra, (b) CD spectra of Cu<sup>2+</sup>/Ac-PAHFAHAQEHQDP-Am system; M:L ratio 0.9:1.  $C_M = 0.63 \cdot 10^{-3}$  M, optical path 1 cm.

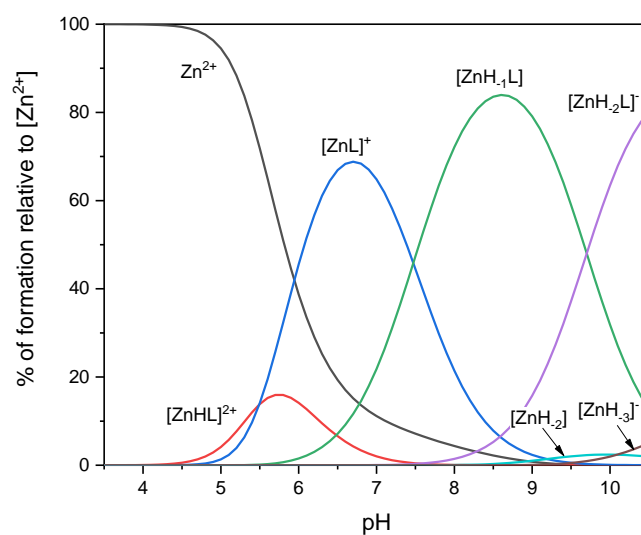

**Figure S8.** Species distribution diagram of Zn<sup>2+</sup>/Ac-GPTHSHFGD-Am; M:L ratio 0.8:1,  $C_M = 0.79 \cdot 10^{-3}$  M.

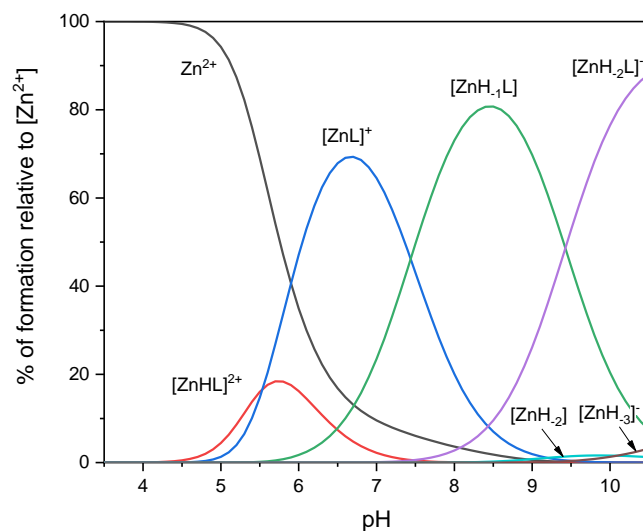

**Figure S9.** Species distribution diagram of  $\text{Zn}^{2+}/\text{Ac-GPHTHAHFGD-Am}$ ; M:L ratio 0.8:1,  $C_M = 0.79 \cdot 10^{-3} \text{ M}$ .

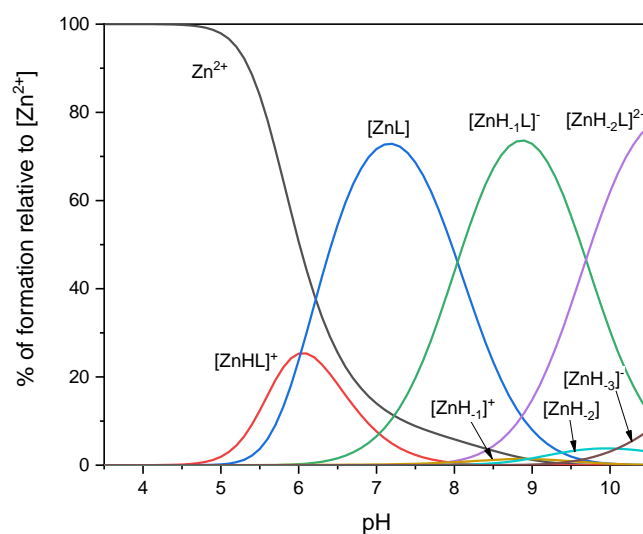

**Figure S10.** Species distribution diagram of  $\text{Zn}^{2+}/\text{Ac-PSHFAHAQEHDQP-Am}$ ; M:L ratio 0.8:1,  $C_M = 0.79 \cdot 10^{-3} \text{ M}$ .

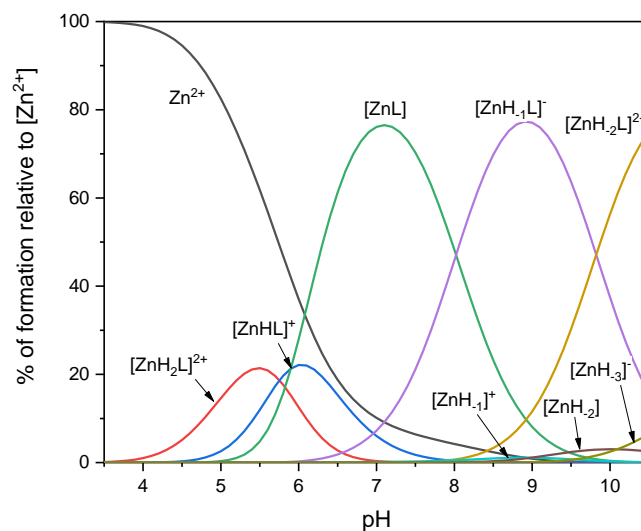

**Figure S11.** Species distribution diagram of  $\text{Zn}^{2+}/\text{Ac-PAHFAHAQEHQDP-Am}$ ; M:L ratio 0.8:1,  $C_M = 0.79 \cdot 10^{-3} \text{ M}$ .

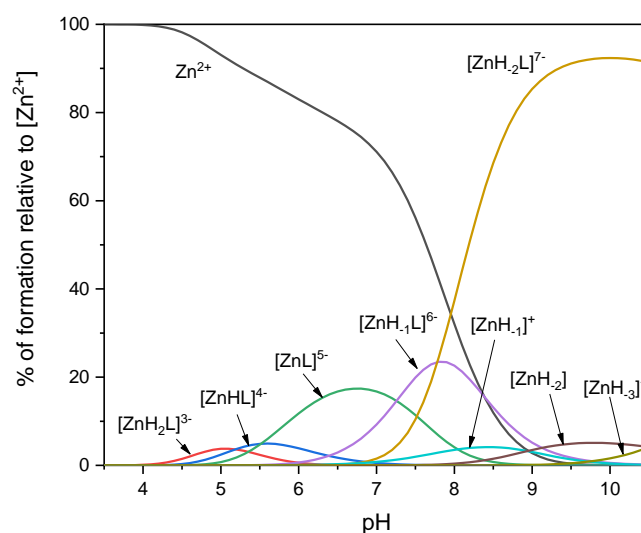

**Figure S12.** Species distribution diagram of  $\text{Zn}^{2+}/\text{Ac-DDEEDLE-Am}$ ; M:L ratio 0.8:1,  $C_M = 0.79 \cdot 10^{-3} \text{ M}$ .



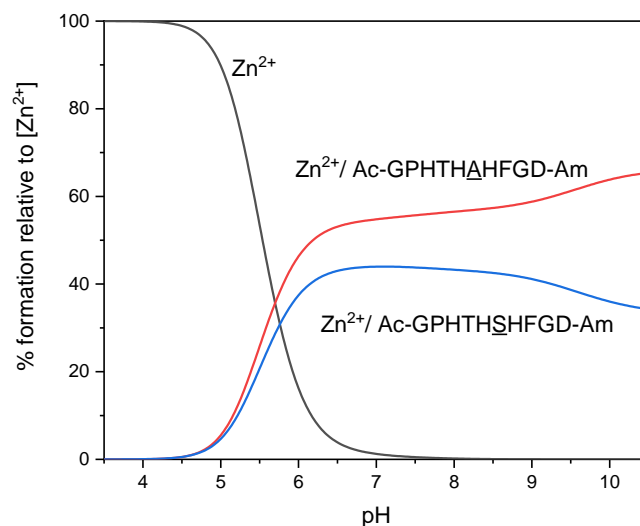

**Figure S13.** Competition plots for a solution containing equimolar concentrations ( $1 \cdot 10^{-3}$  M) of Ac-GPHTSHFGD-Am, Ac-GPHTHAHF $\underline{A}$ HFGD-Am and  $\text{Zn}^{2+}$ .

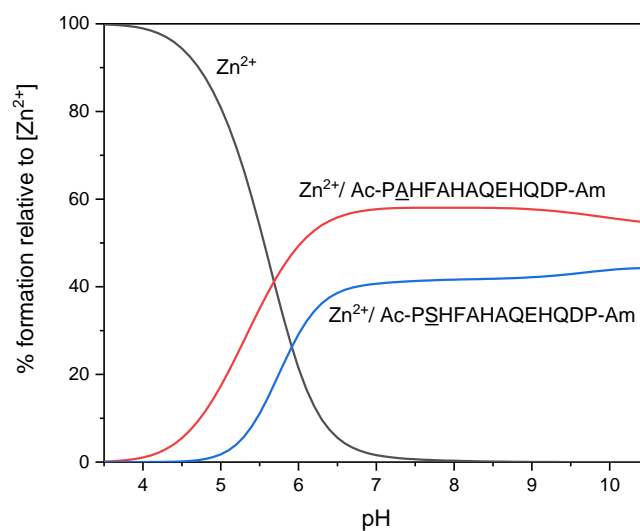

**Figure S14.** Competition plots for a solution containing equimolar concentrations ( $1 \cdot 10^{-3}$  M) of Ac-PSHF $\underline{A}$ HAHQEHQDP-Am, Ac-PAHF $\underline{A}$ HAHQEHQDP-Am and  $\text{Zn}^{2+}$ .

**Table S2.** Stoichiometry, molecular formula and average  $m/z$  value for the species present in ESI-MS spectra of  $\text{Cu}^{2+}$  and  $\text{Zn}^{2+}$  complexes with the studied ligands; L:M molar ratio = 1:1 in water/methanol 50:50 solution.

|                     | Species                                         | Formula           | Average $m/z$ |
|---------------------|-------------------------------------------------|-------------------|---------------|
| L1<br>Positive mode | $\text{H}_4\text{L}^{3+}$                       | C49H68N17O15      | 378.4         |
|                     | $([\text{H}_3\text{L}] \cdot \text{Na})^{3+}$   | C49H67N17O15Na    | 385.7         |
|                     | $([\text{H}_3\text{L}] \cdot \text{K})^{3+}$    | C49H67N17O15K     | 391.1         |
|                     | $[\text{CuH}_2\text{L}]^{3+}$                   | C49H66N17O15Cu    | 398.9         |
|                     | $[\text{ZnH}_2\text{L}]^{3+}$                   | C49H66N17O15Zn    | 399.2         |
|                     | $([\text{ZnHL}] \cdot \text{K})^{3+}$           | C49H65N17O15ZnK   | 412.2         |
|                     | $([\text{CuL}] \cdot \text{NaK})^{3+}$          | C49H64N17O15CuNaK | 418.9         |
| L2<br>Positive mode | $\text{H}_4\text{L}^{3+}$                       | C49H68N17O14      | 373.1         |
|                     | $([\text{H}_3\text{L}] \cdot \text{Na})^{3+}$   | C49H67N17O14Na    | 380.4         |
|                     | $([\text{H}_3\text{L}] \cdot \text{K})^{3+}$    | C49H67N17O14K     | 385.8         |
|                     | $[\text{CuH}_2\text{L}]^{3+}$                   | C49H66N17O14Cu    | 393.6         |
|                     | $[\text{ZnH}_2\text{L}]^{3+}$                   | C49H66N17O14Zn    | 394.2         |
|                     | $([\text{CuHL}] \cdot \text{K})^{3+}$           | C49H65N17O14CuK   | 406.3         |
|                     | $([\text{ZnHL}] \cdot \text{K})^{3+}$           | C49H65N17O14ZnK   | 406.9         |
|                     | $([\text{CuL}] \cdot \text{NaK})^{3+}$          | C49H64N17O14CuNaK | 413.6         |
| L3<br>Positive mode | $\text{H}_5\text{L}^{3+}$                       | C67H95N22O21      | 514.9         |
|                     | $([\text{H}_4\text{L}] \cdot \text{Na})^{3+}$   | C67H94N22O21Na    | 522.2         |
|                     | $([\text{H}_4\text{L}] \cdot \text{K})^{3+}$    | C67H94N22O21K     | 527.6         |
|                     | $[\text{CuH}_3\text{L}]^{3+}$                   | C67H93N22O21Cu    | 535.4         |
|                     | $[\text{ZnH}_3\text{L}]^{3+}$                   | C67H93N22O21Zn    | 536.0         |
|                     | $([\text{CuH}_2\text{L}] \cdot \text{K})^{3+}$  | C67H92N22O21CuK   | 548.1         |
|                     | $([\text{ZnH}_2\text{L}] \cdot \text{K})^{3+}$  | C67H92N22O21ZnK   | 458.7         |
|                     | $([\text{CuHL}] \cdot \text{NaK})^{3+}$         | C67H91N22O21CuNaK | 555.4         |
|                     | $([\text{ZnHL}] \cdot \text{NaK})^{3+}$         | C67H91N22O21ZnNaK | 556.0         |
| L4<br>Positive mode | $\text{H}_5\text{L}^{3+}$                       | C67H95N22O20      | 509.5         |
|                     | $([\text{H}_4\text{L}] \cdot \text{Na})^{3+}$   | C67H94N22O20Na    | 516.9         |
|                     | $([\text{H}_4\text{L}] \cdot \text{K})^{3+}$    | C67H94N22O20K     | 522.2         |
|                     | $[\text{CuH}_3\text{L}]^{3+}$                   | C67H93N22O20Cu    | 530.0         |
|                     | $[\text{ZnH}_3\text{L}]^{3+}$                   | C67H93N22O20Zn    | 530.7         |
|                     | $([\text{CuH}_2\text{L}] \cdot \text{K})^{3+}$  | C67H92N22O20CuK   | 542.7         |
|                     | $([\text{ZnH}_2\text{L}] \cdot \text{K})^{3+}$  | C67H92N22O20ZnK   | 543.4         |
|                     | $([\text{CuHL}] \cdot \text{NaK})^{3+}$         | C67H91N22O20CuNaK | 550.1         |
| L5<br>Negative mode | $\text{H}_5\text{L}^{2-}$                       | C40H57N9O23       | 516.0         |
|                     | $([\text{H}_4\text{L}] \cdot \text{Na})^{2-}$   | C40H56N9O23Na     | 527.0         |
|                     | $([\text{H}_3\text{L}] \cdot \text{Na}_2)^{2-}$ | C40H55N9O23Na2    | 537.9         |
|                     | $[\text{CuH}_3\text{L}]^{2-}$                   | C40H55N9O23Cu     | 546.7         |
|                     | $([\text{H}_2\text{L}] \cdot \text{Na}_3)^{2-}$ | C40H54N9O23Na3    | 548.9         |
|                     | $([\text{CuH}_2\text{L}] \cdot \text{Na})^{2-}$ | C40H54N9O23NaCu   | 557.7         |
|                     | $([\text{ZnH}_2\text{L}] \cdot \text{Na})^{2-}$ | C40H54N9O23ZnNa   | 558.6         |
|                     | $([\text{CuH}_2\text{L}] \cdot \text{K})^{2-}$  | C40H54N9O23CuK    | 565.8         |
|                     | $([\text{CuHL}] \cdot \text{Na}_2)^{2-}$        | C40H53N9O23CuNa2  | 568.7         |

A)

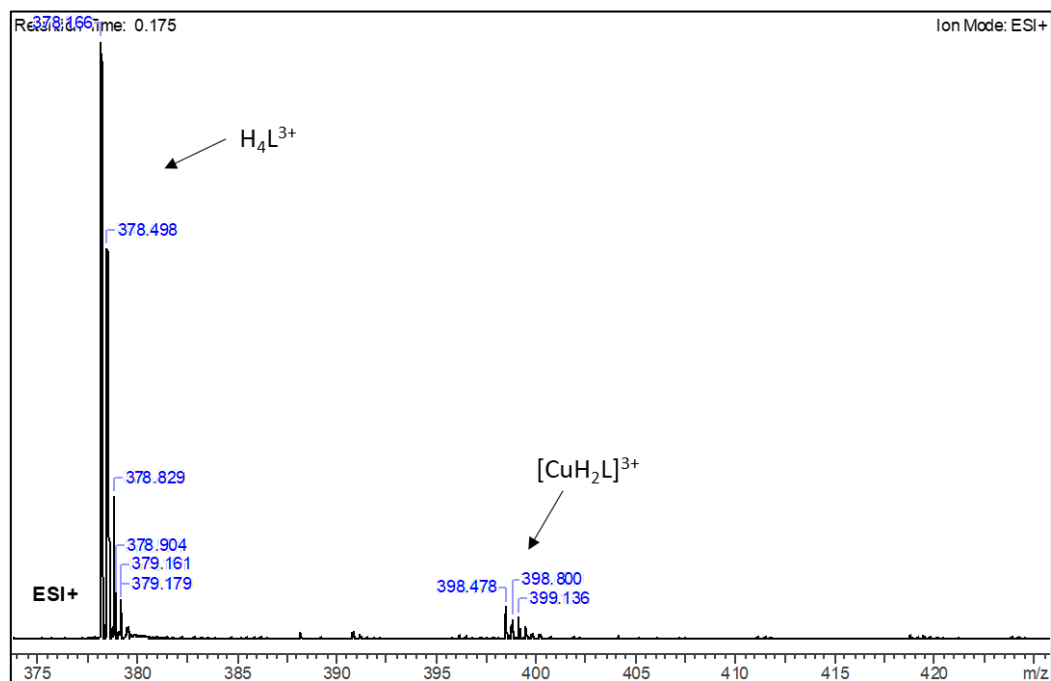

B)

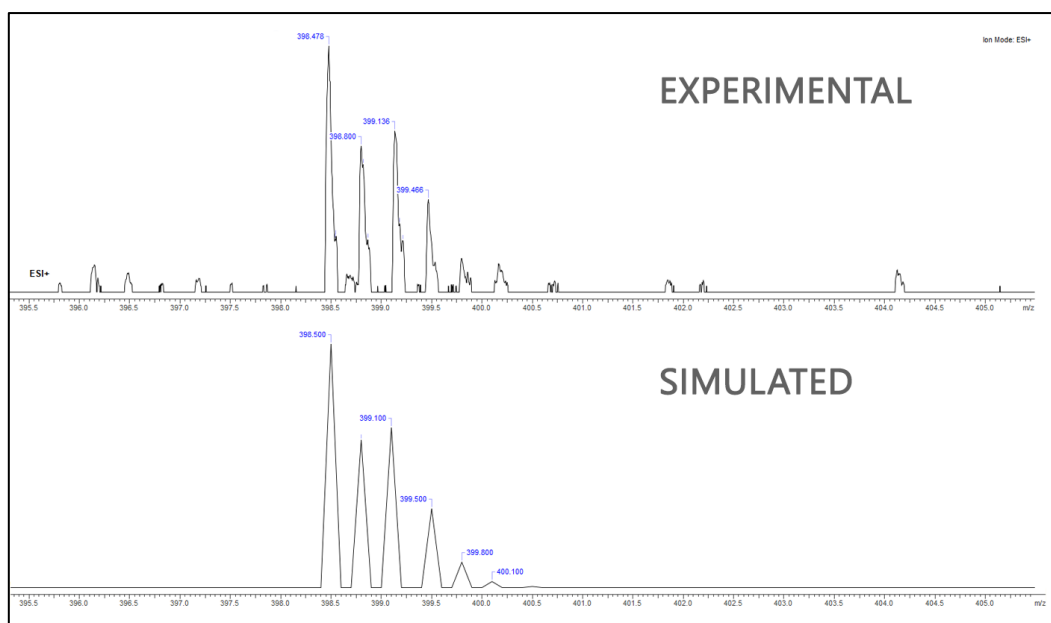

**Figure S15.** A) ESI-MS spectrum for  $\text{Cu}^{2+}/\text{L1}$  system at L:M molar ratio=1:1 in MeOH:H<sub>2</sub>O (1:1) mixture solution. B) Comparison of experimental and simulated isotopic pattern of the chosen metal complex  $[\text{CuH}_2\text{L}]^{3+}$ .

A)

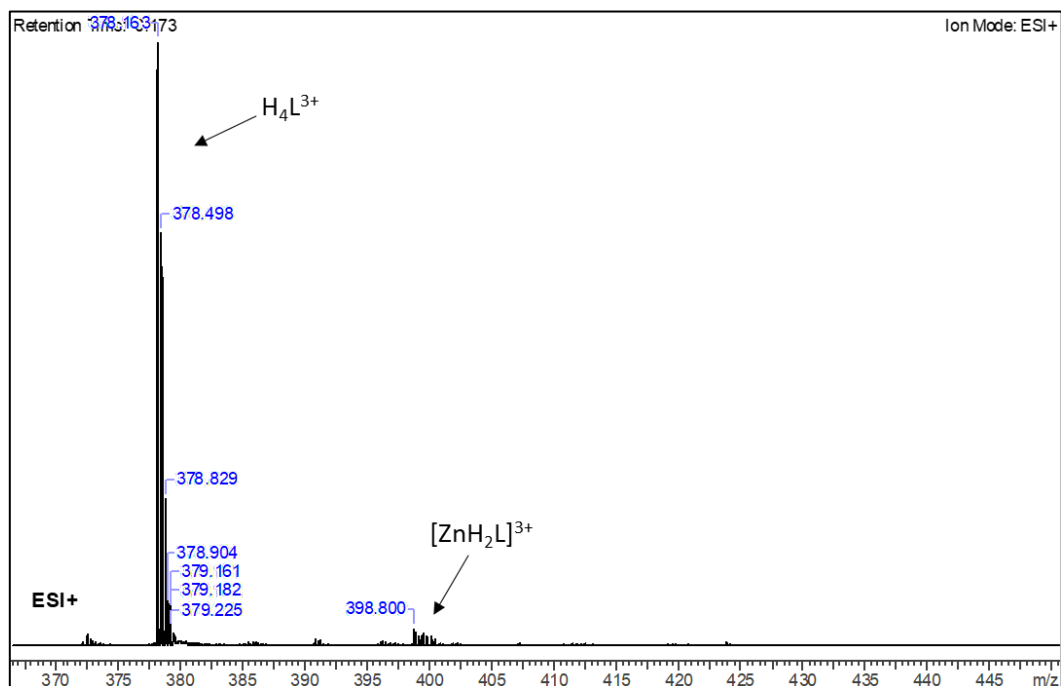

B)

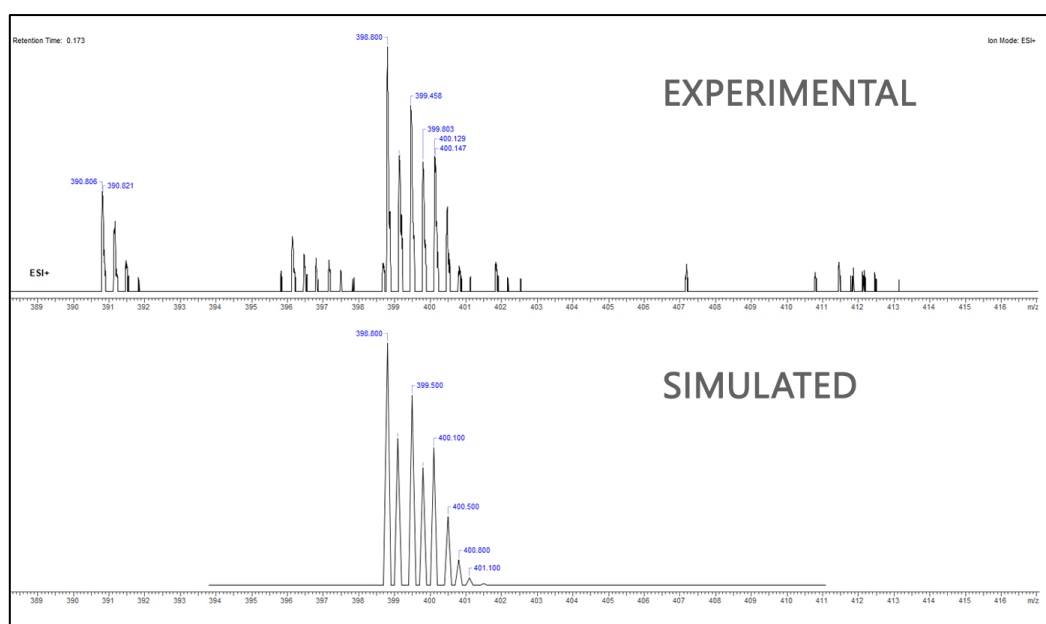

**Figure S16.** A) ESI-MS spectrum for  $Zn^{2+}/L1$  system at L:M molar ratio=1:1 in MeOH:H<sub>2</sub>O (1:1) mixture solution. B) Comparison of experimental and simulated isotopic pattern of the chosen metal complex  $[ZnH_2L]^{3+}$ .

A)

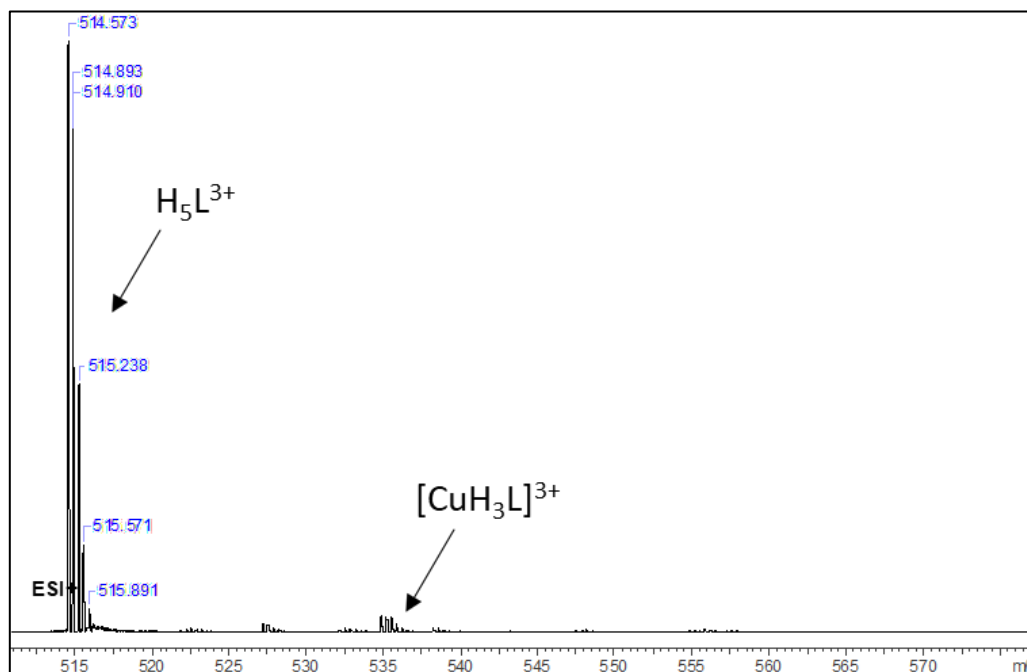

B)

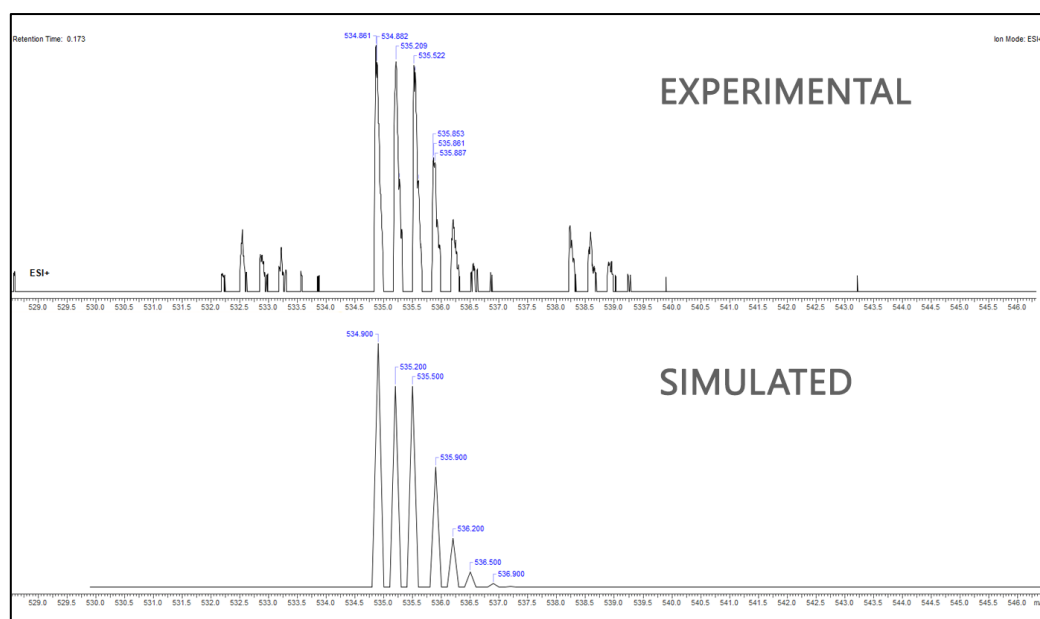

**Figure S17.** A) ESI-MS spectrum for  $\text{Cu}^{2+}/\text{L3}$  system at L:M molar ratio=1:1 in MeOH:H<sub>2</sub>O (1:1) mixture solution. B) Comparison of experimental and simulated isotopic pattern of the chosen metal complex  $[\text{CuH}_3\text{L}]^{3+}$ .
